# Supplementary material for: Hydrophilic Mineral Coating of Membrane Substrate for Reducing Internal Concentration Polarization (ICP) in Forward Osmosis
Source: PubMed Central journal article supplement (PMC4726141; doi:10.1038/srep19593), 2016-01-22
Supplement: srep19593-s1.pdf [file srep19593-s1.pdf]

**Supporting information for**

**Hydrophilic Mineral Coating of Membrane Substrate for Reducing Internal Concentration  
Polarization (ICP) in Forward Osmosis**

Qing Liu<sup>+</sup>, Jingguo Li<sup>+</sup>, Zhengzhong Zhou, Jianping Xie\*, Jim Yang Lee\*

Department of Chemical & Biomolecular Engineering,

National University of Singapore

10 Kent Ridge Crescent, Singapore 119260

\* Corresponding author

Email: [cheleej@nus.edu.sg](mailto:cheleej@nus.edu.sg)

Email: [chexiej@nus.edu.sg](mailto:chexiej@nus.edu.sg)

Fax: (65)-67791936

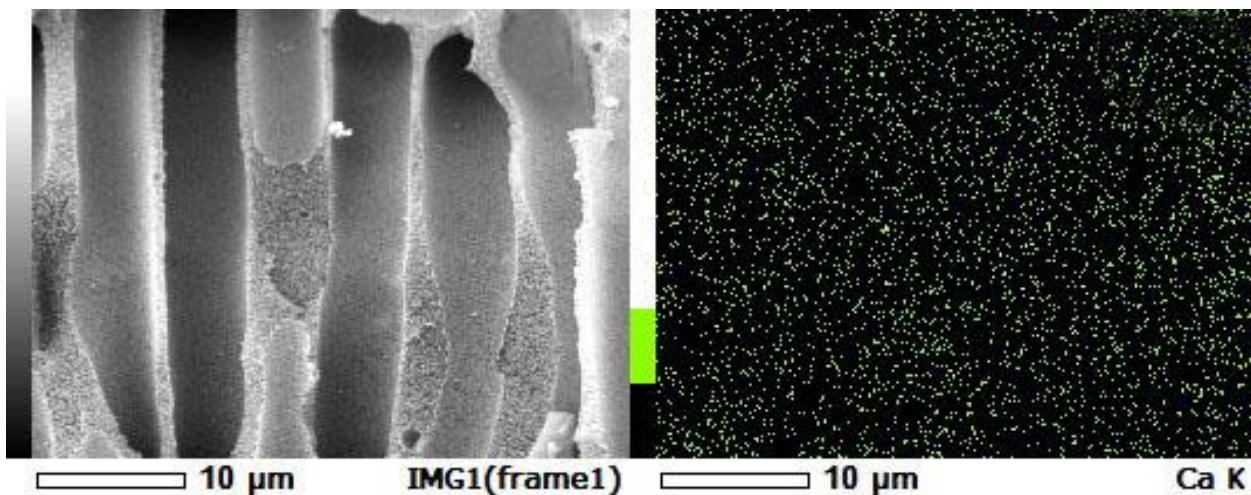

**Figure S1:** EDX result of the cross-section of PES/PAA5/CaCO<sub>3</sub> membrane

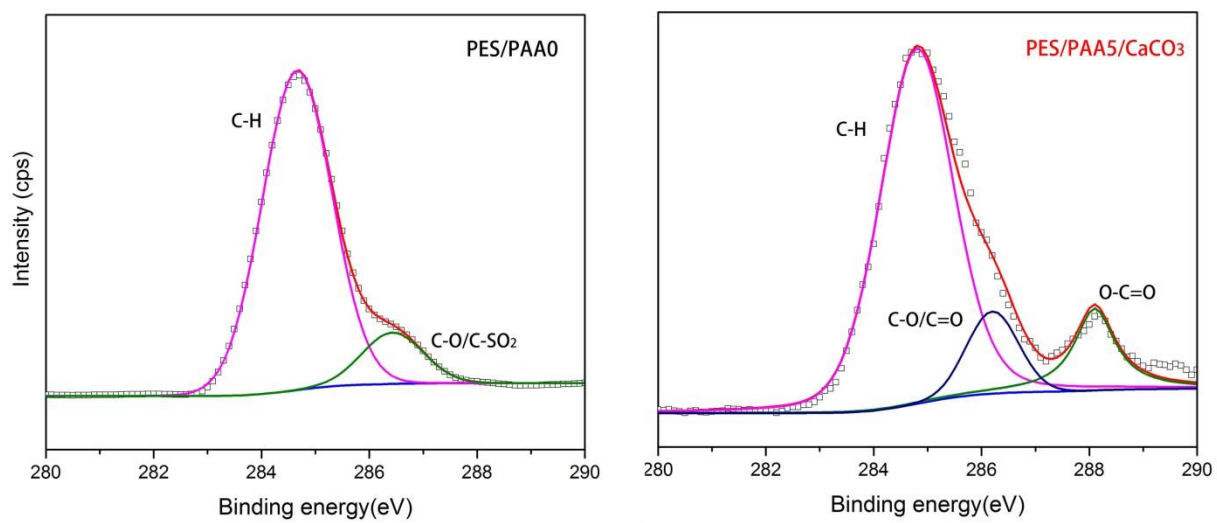

**Figure S2:** C 1s core level spectra of membranes

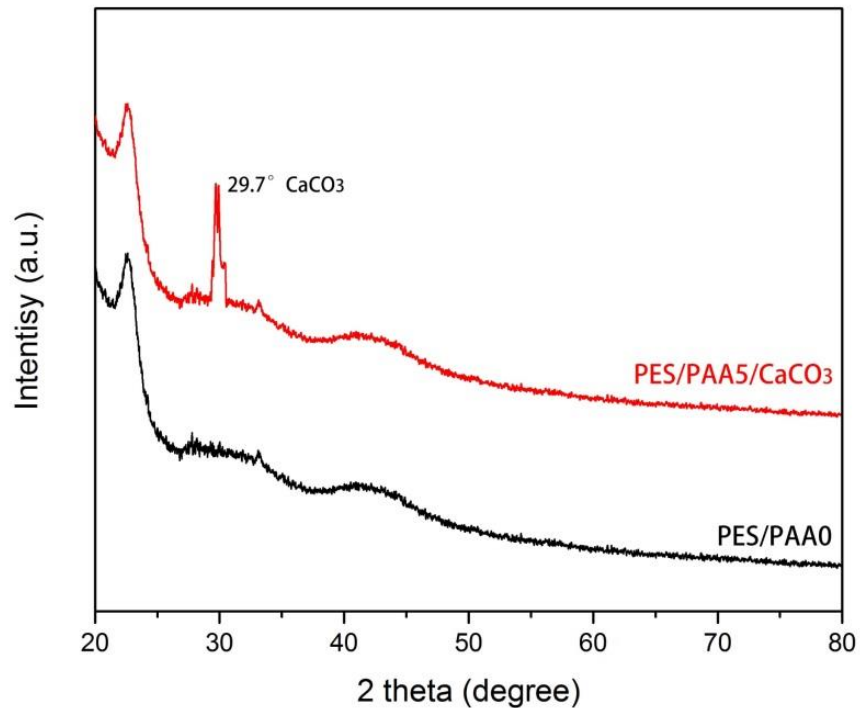

**Figure S3:** XRD patterns of PES/PAA0 membrane and PES/PAA5/CaCO<sub>3</sub> membrane.

| Membrane                   | Young's modulus (MPa) | Tensile strength (MPa) | Elongation at break (%) |
|----------------------------|-----------------------|------------------------|-------------------------|
| PES                        | 152.0 ± 22.4          | 4.28 ± 0.6             | 17.1 ± 4.3              |
| PES/PAA5                   | 89.2 ± 11.6           | 3.69 ± 0.4             | 23.1 ± 5.2              |
| PES/PAA5/CaCO <sub>3</sub> | 246.1 ± 35.6          | 5.74 ± 0.7             | 3.77 ± 2.6              |

**Table S1:** Mechanical properties of membranes

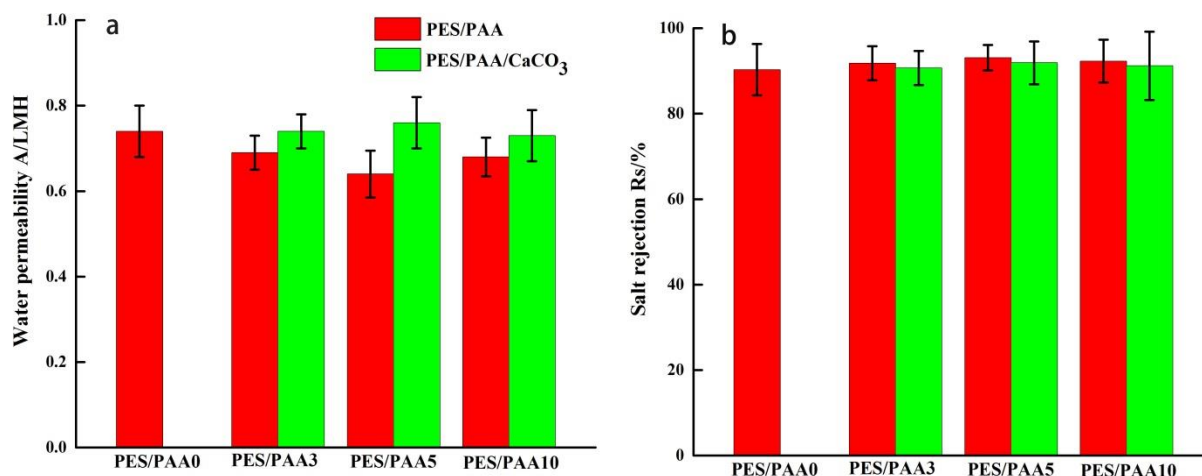

**Figure S4:** Intrinsic transport parameters (water permeability (A) and the salt (NaCl) rejection (R)) of membranes

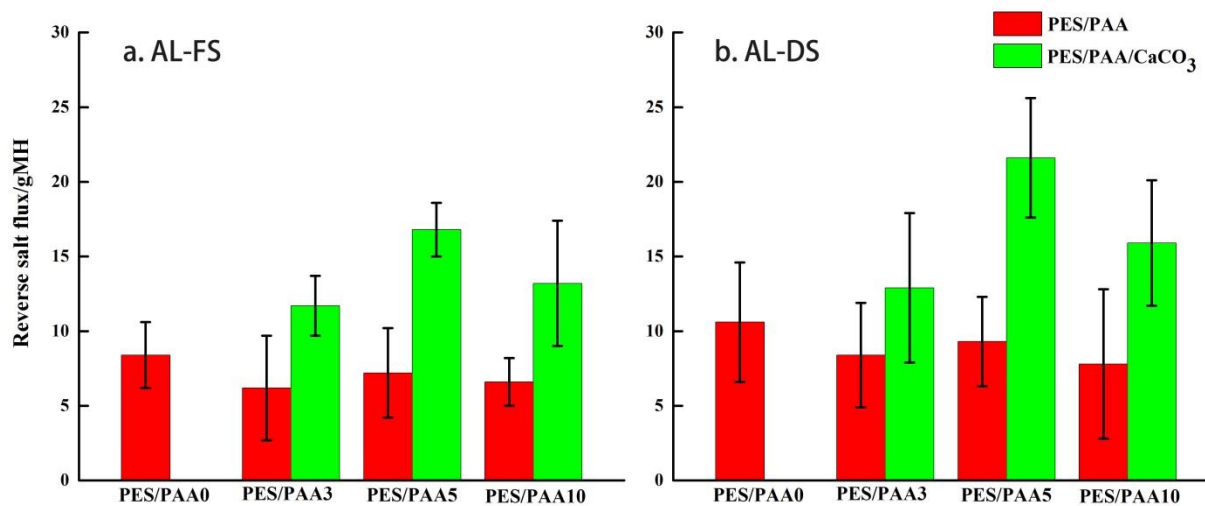

**Figure S5:** FO reverse salt flux of membranes at (a) AL-FS orientation and (b) AL-DS orientation

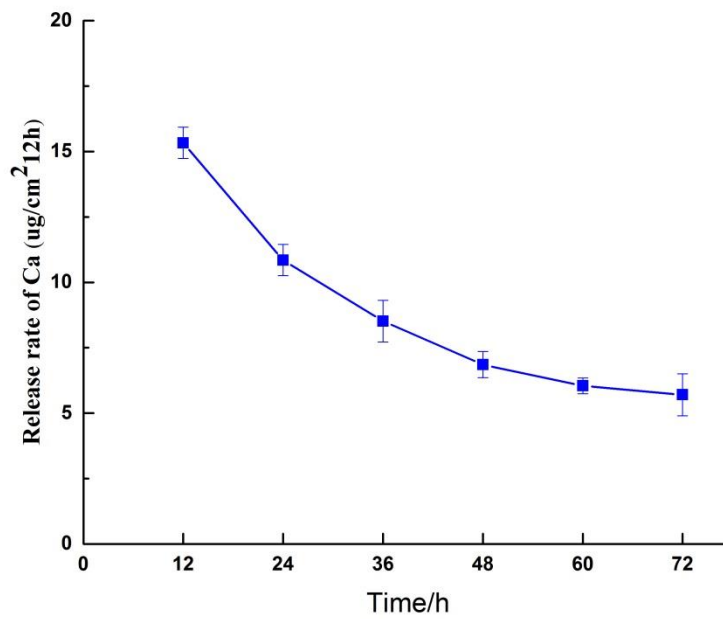

**Figure S6:** Calcium releasing rate of the PES/PAA5/CaCO<sub>3</sub> membrane.

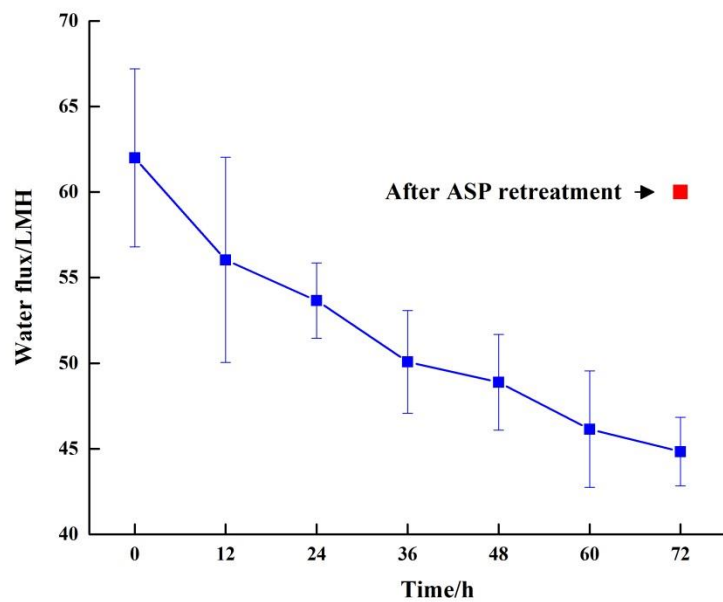

**Figure S7:** FO water flux decline in AL-DS mode with time
